# Supplementary material
Source: publisher figshare collection journal article supplement (https://acs.figshare.com/ndownloader/files/3743332)
Supplement: Supplementary file 1 [file 3743332]

# **Non-targeted Analysis Using Ultra-Performance Liquid Chromatography-Quadrupole-Time of Flight Mass Spectrometry Uncovers the Effects of Harvest Season on the Metabolites and Taste Quality in Tea (*Camellia sinensis* L.)**

Weidong Dai<sup>1</sup>, Dandan Qi<sup>1</sup>, Ting Yang, Haipeng Lv, Li Guo, Yue Zhang, Yin Zhu,  
Qunhua Peng, Dongchao Xie, Junfeng Tan\*, Zhi Lin\*\*

Key Laboratory of Tea Biology and Resources Utilization, Ministry of Agriculture,  
Tea Research Institute, Chinese Academy of Agricultural Sciences, 9 Meiling South  
Road, Hangzhou, Zhejiang 310008, PR China

<sup>1</sup> These authors contributed equally to this work

\* Corresponding author

\* Tel.: +86 571 86650617; Fax: +86 571 866503154; E-mail addresses:  
tjfcallme@tricaas.com

\*\* Tel.: +86 571 86650617; Fax: +86 571 866503154; E-mail addresses:  
linzhi@caas.cn

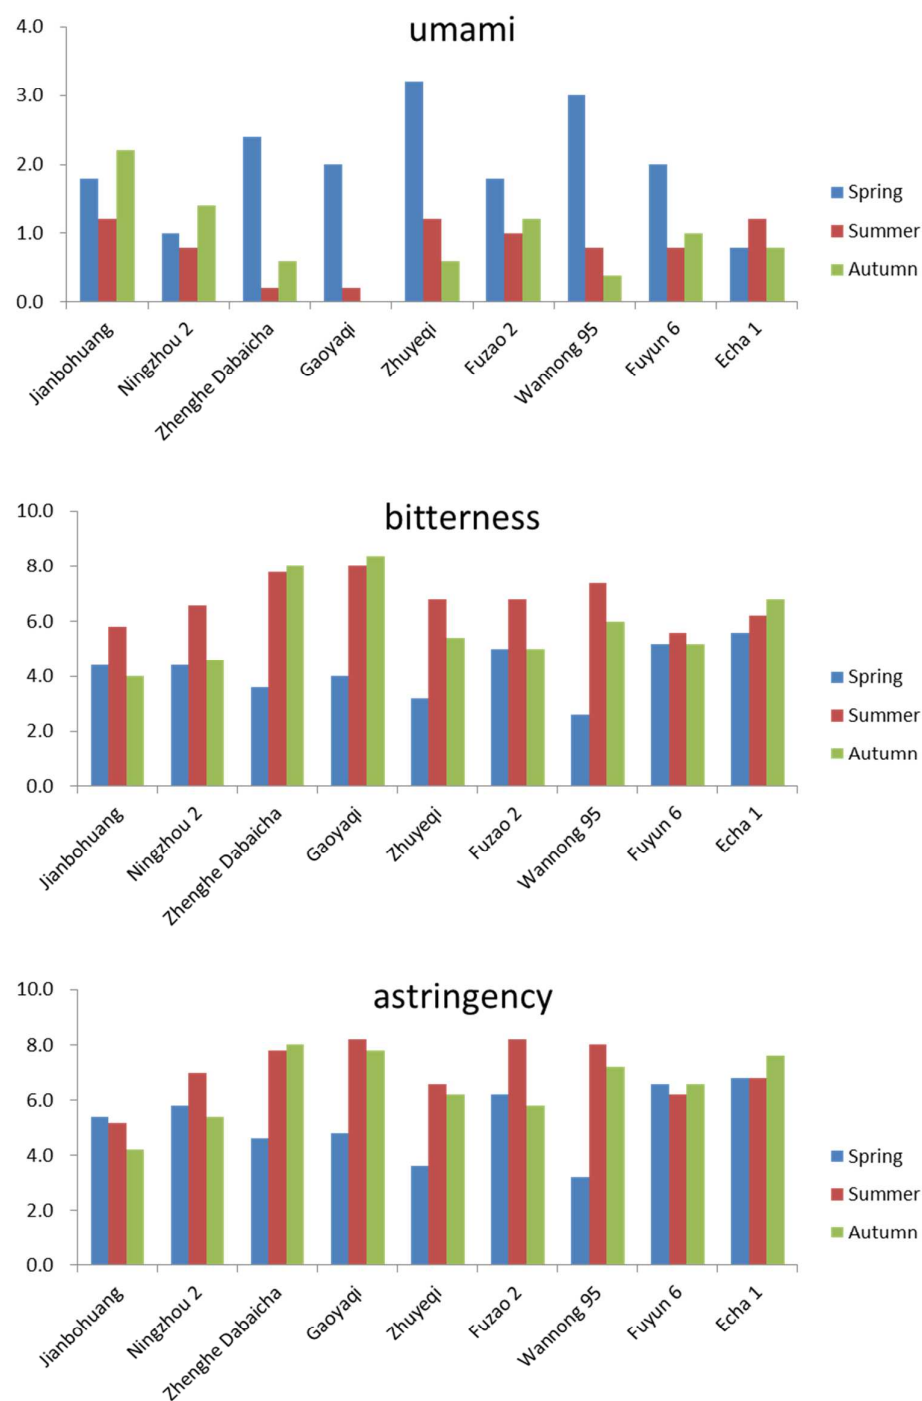

Figure S1. The effects of harvest season on the taste of 9 tea varieties.

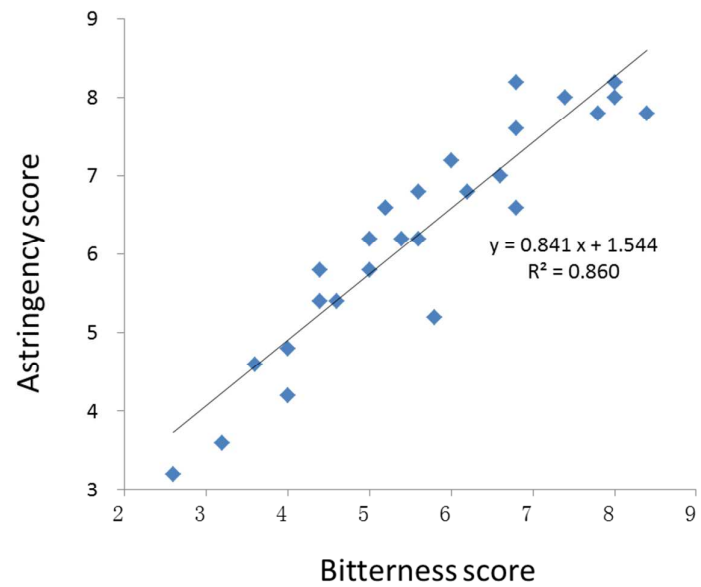

Figure S2. Correlation of tea bitterness and astringency.
